It is made available under a [CC-BY 4.0 International license](#) .

1  
2  
3  
4  
5  
6  
7  
8  
9  
10  
11  
12  
13  
14  
15  
16  
17  
18  
19  
20

## Isolation thresholds for curbing SARS-CoV-2 resurgence

Laith Yakob

Faculty of Infectious and Tropical Diseases, London School of Hygiene & Tropical Medicine, London,  
England, WC1E 7HT ([laith.yakob@lshtm.ac.uk](mailto:laith.yakob@lshtm.ac.uk); +44(0)207 927 2684)

21 **Summary**

22 Self-instigated isolation is heavily relied on to curb SARS-CoV-2 transmission. Accounting for  
23 uncertainty in the latent and prepatent periods, as well as the proportion of infections that remain  
24 asymptomatic, the limits of this intervention at different phases of infection resurgence are  
25 estimated. We show that by October, SARS-CoV-2 transmission rates in England had already begun  
26 exceeding levels that could be interrupted using this intervention alone, lending support to the  
27 second national lockdown on November 5<sup>th</sup>.

28

29 **Main text**

30 A general population lockdown occurred in England on 23<sup>rd</sup> March 2020 to reduce SARS-CoV-2  
31 transmission. This drastic intervention successfully inhibited disease spread by rapidly depleting the  
32 opportunities for transmission events between infected and susceptible people remaining in general  
33 circulation [1].

34 Subsequent to easing out of lockdown from July 4<sup>th</sup> 2020, infections resurged and England entered  
35 its second national lockdown on November 5<sup>th</sup> 2020. The return of millions of (largely susceptible)  
36 people to general circulation underlies the epidemic re-entering an exponential growth phase.

37 However, also culpable in the current public health emergency is the failure of interventions during  
38 the period following lockdown's release.

39 Contact tracing endeavours to reduce SARS-CoV-2 transmission have thus far proven ineffective in  
40 England and so isolation is primarily instigated by those responding to symptoms' development in  
41 themselves or their close associations [2]. The mechanism by which this reactive isolation operates is  
42 importantly distinct from pre-emptive mass quarantine (lockdown). Symptoms-prompted, reactive  
43 isolation only applies to individuals who are infected (c.f. the total population), and, more

44 specifically, to those who register symptoms. Hence infectious individuals who have not yet  
45 experienced symptoms, or who will never experience them, are missed.

46 The mathematical epidemiology of reactive isolation is fairly nascent yet critical in the context of the  
47 current epidemic. Here, we generate estimates for reactive isolation thresholds that account for  
48 uncertainties in the latent and pre-patent period of infection as well as in the proportion of infected  
49 individuals that register and respond appropriately to symptoms.

50

### 51 *Mathematical derivation of reactive self-isolation*

52 Beginning with the simplest derivation for physical isolation: the pre-emptive quarantine threshold  
53 proportion ( $Q$ ) is  $Q > (1 - (1/R))$  where ' $R$ ' is the reproduction number [3]. For reactive isolation ( $Q^*$ ),  
54 this threshold is inflated to account for the leaked infections occurring because of the delay between  
55 becoming infectious and first exhibiting symptoms:  $Q^* > (1 - (1/R)) \times [(g-1)/g]^{-(p-l)}$ . Respectively,  
56  $p$  and  $l$  are the prepatent and latent period of infection (in days), and  $g$  is the mean duration of  
57 infectiousness (12 days on average [4]). If symptoms typically develop at the same time as an  
58 individual becomes infectious, the square-bracket component equals one and the original threshold  
59 ( $Q$ ) is regained. A further modification can be made to account for the proportion of infections that  
60 never give rise to symptoms (denoted ' $a$ '):  $Q^{**} > (1/(1 - a)) \times (1 - (1/R)) \times [(g-1)/g]^{-(p-l)}$ . For  
61 example, if half of infections remained asymptomatic, the proportion of symptomatic infections that  
62 need to be isolated to achieve an equivalent impact must be doubled. As with those who never  
63 develop symptoms, individuals who fail to respond appropriately to developing symptoms – early  
64 indication is that this is not a negligible proportion [5] – will continue to contribute to transmission,  
65 so ' $a$ ' could be considered a composite of these two proportions.

66

67

68 *Accounting for uncertainty in parametrization*

69 The latent and prepatent periods are quite variable for COVID-19 patients. Instead of single point  
70 estimates for these parameters, collated data form a distribution of reported times. The latent  
71 period is drawn at random from a Weibull distribution and then subtracted from the random draw  
72 from a second Weibull distribution depicting the range of reported prepatent periods. Fig 1A  
73 illustrates these distributions as informed by the clinical and epidemiological literature [6-8]. Also  
74 shown is the distribution of times between development of infectiousness and symptoms onset as  
75 fitted to 10,000 random draws. The distributions of prepatent and latent periods overlap so to avoid  
76 the possibility of symptoms developing prior to infectiousness, random draws whereby  
77 infectiousness trailed the day of symptoms onset were removed and resampled. 10,000 random  
78 draws were then made from this newly derived distribution of the delay between infectiousness and  
79 symptoms, and the isolation threshold ( $Q^{**}$ ) was estimated for a range of  $R$  values and a range of  
80 asymptomatic proportions (Python code: <https://github.com/lwyakob/COVIDquarantine>).

81

82 *Isolation thresholds accounting for uncertainty*

83 Fig 1B shows the mean isolation threshold required to control SARS-CoV-2 accounting for the range  
84 of estimates for the prepatent and latent periods. The value for  $R$  is dynamic, varying according to  
85 current intervention effectiveness and population-level susceptibility, so the isolation threshold is  
86 shown for a range of plausible  $R$  values. The form of the relationship between  $Q^*$  and  $R$  shows an  
87 isolation threshold that increases asymptotically with reproduction number. However, allowing for  
88 uncertainty in prepatent and latent periods results in a wide 95% prediction interval. The  
89 interpretation is that when accounting for both the uncertainty in estimating the population mean,  
90 plus the random variation of the individual values, reactive isolation cannot interrupt transmission  
91 (at least 95 times out of 100) if  $R$  already exceeds a value of  $\sim 2.3$ .

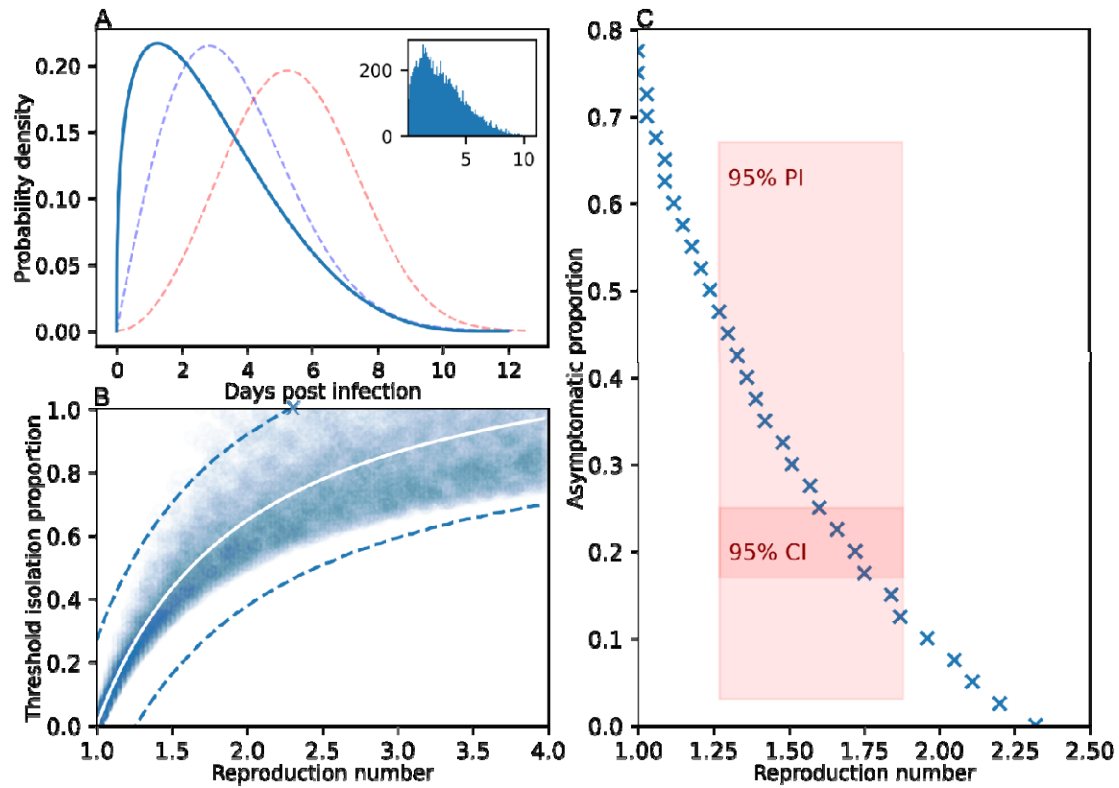

92

93 Figure 1. A) Dashed lines indicate distributions for the latent (blue, Weibull( $\alpha=4$ ,  $\beta=2$ )) and prepatent  
94 period (red, Weibull( $\alpha=6$ ,  $\beta=3$ )) as derived from the COVID-19 literature [6-8]. The solid line is the  
95 resulting distribution for the time difference between the two from which 10,000 random draws  
96 were made (inset). B) The isolation threshold ( $Q^*$ ) as calculated for the 10,000 random draws along  
97 with the mean (white line) and 95% predictive interval (dashed lines). The blue cross indicates the  
98 theoretical maximum  $R$  number for which reactive isolation may interrupt transmission. C) The  
99 maximum asymptomatic proportion of COVID-19 infections that permits transmission interruption  
100 by reactive isolation for a range of  $R$  values (using the expression for  $Q^*$ ). The red boxes illustrate  
101 estimates for England as of October 2020 [9, 10].

102

103

104 Reactive isolation is further limited when asymptomatic infections comprise a non-negligible  
105 proportion (alternatively, when those exhibiting symptoms fail to isolate themselves to some  
106 degree). Fig 1C shows the theoretical limits of the proportion of infections that can be asymptomatic  
107 and yet SARS-CoV-2 transmission interrupted through isolating symptomatic individuals (using the  
108  $Q^{**}$  expression). Superimposed on this trade-off between the reproduction number and the  
109 isolation threshold are estimates for  $R$  in England as of October 2020 [10], and the 95% confidence  
110 and predictive intervals for the proportion of infections that remain asymptomatic as generated by a  
111 living systematic review [9]. Respectively, by October 30% and 60% of these parameter spaces were  
112 already beyond the level at which reactive isolation can be sufficient to interrupt transmission (i.e.,  
113 these regions fall to the right of the hatched arc in Fig 1C).

114

#### 115 *Limitations and future work*

116 One limitation of the current analysis is the consideration of transmission and control at the  
117 population level rather than stratified by various risk factors. To address this, results were generated  
118 for a full range of  $R$  values. It is important to note that stratification would impact the derivation of  $R$   
119 but not the population-level isolation thresholds calculated for a given  $R$  value [11]. Another  
120 limitation is the implicit assumption that, in the absence of intervention, asymptotically infected  
121 individuals contribute to onwards transmission as much as symptomatically infected individuals. It is  
122 unclear how questionable this assumption is but clinical studies indicate that asymptomatic and  
123 symptomatic individuals have similar viral loads [12]. Should evidence arise of their differential  
124 contributions to transmission, the model and code associated with this study can be modified easily  
125 to account for this feature.

126 Even during pre-emptive quarantine (i.e., lockdown) the formulae described here continue to apply  
127 to those who remain in general circulation (e.g., essential personnel). Future work should look at  
128 how isolation thresholds can be estimated to inform this intervention combination, among others.

## 129    **References**

- 130    (1)    **Nightingale E, Brady OJ, Yakob L.** The importance of saturating density dependence for  
131    predicting SARS-CoV-2 resurgence. *medRxiv* 2020: 2020.2008.2028.20183921.
- 132    (2)    **Moon J, et al.** Optimising 'Test and Trace' Systems: Early lessons from a comparative analysis  
133    of six countries. *SSRN* 2020: <http://dx.doi.org/10.2139/ssrn.3694441>.
- 134    (3)    **Anderson RM, May RM.** *Infectious Diseases of Humans: Dynamics and Control*. Oxford:  
135    Oxford University Press, 1991.
- 136    (4)    **He X, et al.** Temporal dynamics in viral shedding and transmissibility of COVID-19. *Nature*  
137    *Medicine* 2020; **26**(5): 672-675.
- 138    (5)    **Smith LE, et al.** Factors associated with adherence to self-isolation and lockdown measures  
139    in the UK: a cross-sectional survey. *Public Health* 2020; **187**: 41-52.
- 140    (6)    **Nishiura H, Linton NM, Akhmetzhanov AR.** Serial interval of novel coronavirus (COVID-19)  
141    infections. *International Journal of Infectious Diseases* 2020; **93**: 284-286.
- 142    (7)    **Backer JA, Klinkenberg D, Wallinga J.** Incubation period of 2019 novel coronavirus (2019-  
143    nCoV) infections among travellers from Wuhan, China, 20–28 January 2020. *Eurosurveillance* 2020;  
144    **25**(5): 2000062.
- 145    (8)    **Kretzschmar ME, et al.** Impact of delays on effectiveness of contact tracing strategies for  
146    COVID-19: a modelling study. *The Lancet Public Health* 2020; **5**(8): e452-e459.
- 147    (9)    **Buitrago-Garcia D, et al.** Occurrence and transmission potential of asymptomatic and  
148    presymptomatic SARS-CoV-2 infections: A living systematic review and meta-analysis. *PLOS Medicine*  
149    2020; **17**(9): e1003346.
- 150    (10)    **Riley S, et al.** High prevalence of SARS-CoV-2 swab positivity and increasing R number in  
151    England during October 2020: REACT-1 round 6 interim report. *medRxiv* 2020:  
152    2020.2010.2030.20223123.
- 153    (11)    **Fine P, Eames K, Heymann DL.** "Herd Immunity": A Rough Guide. *Clinical Infectious Diseases*  
154    2011; **52**(7): 911-916.
- 155    (12)    **Lee S, et al.** Clinical Course and Molecular Viral Shedding Among Asymptomatic and  
156    Symptomatic Patients With SARS-CoV-2 Infection in a Community Treatment Center in the Republic  
157    of Korea. *JAMA Internal Medicine* 2020; **180**(11): 1447-1452.

158

159

160

161            **Financial support:** The author received no financial support for this work.

162            **Conflicts of interests:** None.

163

164
